# Supplementary material
Source: Springer Nature journal article supplement (https://www.springermedizin.de/resource/supplementary/12885_2014_4997_MOESM7_ESM.pdf/9467968)

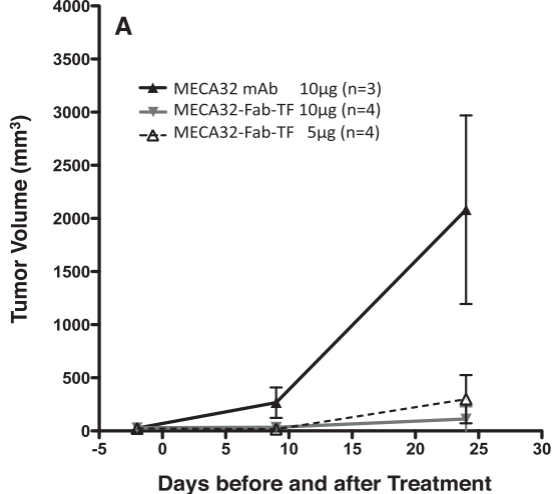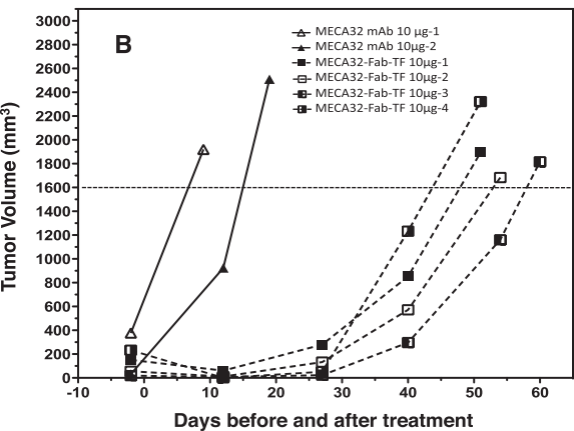

Supplement: MOESM7 [file 9467968]
